# Supplementary material for: Anion complexation and electrochemical behaviour of ferrocene-appended amido-pyrrole cleftsElectronic supplementary information (ESI) available: 1H and 13C NMR spectra of 1 and 2, 1H NMR titrations of 1 and 2 with various putative anionic guests and with chloride following ferrocene CH resonances. See http://www.rsc.org/suppdata/nj/b2/b202989h/
Source: Royal Society of Chemistry journal article supplement (doi:10.1039/b202989h), 2002-05-31
Supplement: b202989h.doc [file b202989h.doc]

Anion complexation and electrochemical behaviour of ferrocene appended amido-pyrrole clefts

Guy Denuault, Philip A. Gale,* Michael B. Hursthouse, Mark E. Light and Colin N. Warriner

a Department of Chemistry, University of Southampton, Southampton SO17 1BJ. Fax+44 23 80596805X; Tel: +44 23 80593332; E-mail: Philip.gale@soton.ac.uk

Supplementary information

**Figure S1** 1H NMR Spectrum of **1** in dichloromethane-d2

**Figure S2** 13C NMR spectrum of **1** in chloroform-d.

**Figure S3**  1H NMR Spectrum of **2** in chloroform-d

**Figure S4** 13C NMR Spectrum of **2** in chloroform-d

**Figure S5** 1H NMR titrations of compound **1** with various putative anionic guests in dichloromethane–d2

**Figure S6** 1H NMR titrations of compound **1** chloride following ferrocene CH resonances in dichloromethane–d2

**Figure S7** 1H NMR titrations of compound **2** with various putative anionic guests in dichloromethane–d2

**Figure S8** 1H NMR titrations of compound **2** chloride following ferrocene CH resonances in dichloromethane–d2
